# Supplementary material
Source: PubMed Central journal article supplement (PMC9943542)
Supplement: NIHMS1858000-supplement-Supplementary_Material.pdf [file NIHMS1858000-supplement-Supplementary_Material.pdf]

**Supplemental Table 1.** Other mechanisms of injury.

| <b>Other Mechanisms of Injury</b>   | <b>N = 297</b> |
|-------------------------------------|----------------|
| <b>Equestrian</b>                   | 10             |
| <b>Clay pigeon</b>                  | 1              |
| <b>Cliff jumping</b>                | 1              |
| <b>Construction</b>                 | 8              |
| <b>Cow kick</b>                     | 2              |
| <b>Dog bite</b>                     | 1              |
| <b>Fire explosion</b>               | 3              |
| <b>Firework</b>                     | 3              |
| <b>Go-kart</b>                      | 1              |
| <b>Hang-gliding</b>                 | 1              |
| <b>Jet ski</b>                      | 1              |
| <b>Jumped out of moving vehicle</b> | 2              |
| <b>Mo-ped</b>                       | 1              |
| <b>Paragliding</b>                  | 1              |
| <b>Plane crash</b>                  | 2              |
| <b>Rock climbing</b>                | 4              |
| <b>Scooter</b>                      | 16             |
| <b>Skateboard</b>                   | 5              |
| <b>Skiing</b>                       | 13             |
| <b>Skydiving</b>                    | 1              |
| <b>Sledding accident</b>            | 1              |
| <b>Snow blower</b>                  | 1              |
| <b>Snowmobile</b>                   | 6              |
| <b>Sports related</b>               | 11             |
| <b>Suicide attempt</b>              | 4              |
| <b>Trampoline</b>                   | 1              |
